# Supplementary material for: Sleep and memory complaints in long COVID: an insight into clustered psychological phenotypes
Source: PeerJ. 2024 Jan 30;12:e16669. doi: 10.7717/peerj.16669 (PMC10836207; doi:10.7717/peerj.16669)
Supplement: Supplemental Information 3 [file peerj-12-16669-s003.xlsx]

## Sheet: CASOS & CONTROLES
In Portuguese =>	CASO OU CONTROLE	Total Casos	QUEM FAZ A LIGAÇÃO ATUAL? - COVID LONGA!!	Data da ligação_Covid longa	CASO POSITIVO Nome para caso positivo_Casos positi	Uso Covid longa Ensaio 1_lookup de Casos positivo	TELEFONE Caso positivo_Covid longa	Data de nascimento - Caso positivo	Idade_de Idade (fórmula)_Caso Positivo	Idade 18 a 29	Idade 30 a 49	Idade 50 a 64	Idade >64	Sexo Feminino (0 ou 1)	Gênero (sexo) _ de Casos positivos	Qual (n usar) o seu peso? (Kg) (original)	Qual (n usar) a sua altura? (m) original	Peso usado (c correções)	Altura usada (c correções)	IMC	IMC arredondado (p fórm. func.)	Underweight	Normal	Pré-obesity	Obesity		Data resultado swab nasal (PCR)	Desfecho clínico_de Casos positivos	PRECISOU DE OXIGÊNIO?	INTERNAÇÃO?	FOI INTUBADO?	PRECISOU DE UTI/UCI?	Meses pós-diagnóstico Covid (5-8)_Covid longa	#EST PROBL. SONO (insat.+muito insat+sonol.diurna)	EST MEMÓRIA #4.7.1 (0 ou 1)	[CASO=1; Excel] EST PROBL. MEMÓRIA + SONO (1+1)	[CASO=1; Teamdesk] EST PROBL. MEMÓRIA + SONO (1+1)	[CONTROLE=1] "EST" SEM PROBL. MEM. E SONO (0+0)	TRISTEZA depois da Covid?	TRISTEZA nos últimos 5 meses?	1. NERVOSO, ANSIOSO, TENSO_Covid longa	2. NÃO é capaz de IMPEDIR/CONTROLAR PREOCUPAÇÕES	2-Sr.(a) mantém algum sintoma? (Covid longa)	Meses pós-Covid (cópia p visualizar)_Covid longa	Qual a vacina? (Coronavac, Oxford-Astrazeneca)	Quando tomou a 1a. dose?	Já tomou a 2a. dose? Quando foi?	Idade_de Idade_Casos_Casos Positivos	6 F1 - dor no corpo Form. 1 /musculares (0 ou 1)
In English (below)
Case ID number	Case or control	Count	Name contact tracer (phone call)	Date of phone call	Patient name	Data for Long Covid	Phone number case	Date of birth	Age	18-29 years	30-49 years	50-64 years	>64 years	Gender (1, Female; 0 Male)	Gender	Weight	Height	Weight	Height	Body mass index (BMI)	BMI (rounded value)	Underweight	Normal	Pré-obesity	Obesity		Date of qPCR	Clinical outcome	Use of oxygen?	Hospitalization?	Intubation?	intensive care unit (ICU)	Months after diagnosis	Sleep disturbance (dissatisfied with sleep, very unsatisfied with sleep, drowsiness)	Memory problems	Sleep + Memory problemas (cases)	Sleep + Memory problemas (cases)	Sleep + memory problems (controls)	Sad or depressed during most time after COVID-19 infection?	Sad or depressed during the last 5 months	Last 2 weeks: feel nervous, anxious, or tense?	Last 2 weeks: unable to avoid worries	Presence of symptom after COVID-19		Which vaccine?	When took the 1st. Dose (DD/MM/YYYY)	Took the 2nd. Vaccine dose? (DD/MM/YYYY)	Age	myalgia (acute COVID-19)
2	CASE	1	Anonymized	2021-05-12	Anonymized	Yes	Anonymized	Anonymized	42	0	1	0	0	1	F	56.5	1.59	56.5	1.59	22.3488	22.3	0	1	0	0		2020-09-08	1- Cure	No	No	No	No	8	1	1	1	1	0	No	No	1– Many days	1– Many days	Asymptomatic	8	Unvaccinated			21	1
4	CASE	2	Anonymized	2021-05-18	Anonymized	Yes	Anonymized	Anonymized	29	1	0	0	0	0	M	71	1.64	71	1.64	26.398	26.4	0	0	1	0		2020-09-18	1- Cure	No	No	No	No	8	1	1	1	1	0	No	No	1– Many days	1– Many days	Asymptomatic	8	Sinovac/Instituto Butantã - CoronaVac	2021-01-27	2021-02-24	29	1
7	CASE	3	Anonymized	2021-05-18	Anonymized	Yes	Anonymized	Anonymized	47	0	1	0	0	1	F	93	1.63	93	1.63	35.0032	35	0	0	0	1		2020-09-16	1- Cure	Yes	Yes	No	No	8	1	1	1	1	0	Yes	Yes	3– Almost all days	3– Almost all days	Symptomatic	8	Unvaccinated			47	1
11	CASE	4	Anonymized	2021-05-19	Anonymized	Yes	Anonymized	Anonymized	36	0	1	0	0	0	M	130	1.75	130	1.75	42.449	42.4	0	0	0	1		2020-09-15	1- Cure	No	No	No	No	8	1	1	1	1	0	Yes	Yes	1– Many days	1– Many days	Symptomatic	8	Unvaccinated			35	1
27	CASE	5	Anonymized	2021-05-27	Anonymized	Yes	Anonymized	Anonymized	41	0	1	0	0	1	F	81	1.79	81	1.79	25.2801	25.3	0	0	1	0		2020-09-23	1- Cure	No	No	No	No	8	1	1	1	1	0	No	No	2– More than half of the days	1– Many days	Symptomatic	8	Sinovac/Instituto Butantã - CoronaVac			41	1
32	CASE	6	Anonymized	2021-05-05	Anonymized	Yes	Anonymized	Anonymized	25	1	0	0	0	1	F	81	1.65	81	1.65	29.7521	29.8	0	0	1	0		2020-10-04	1- Cure	No	No	No	No	7	1	1	1	1	0	Yes	Yes	1– Many days	1– Many days	Symptomatic	7	Sinovac/Instituto Butantã - CoronaVac	2021-01-26	2021-02-10	24	1
36	CASE	7	Anonymized	2021-05-03	Anonymized	Yes	Anonymized	Anonymized	35	0	1	0	0	1	F												2020-10-04	1- Cure		No	No	No	7	1	1	1	1	0	Yes	Yes	3– Almost all days	3– Almost all days	Symptomatic	7	Unvaccinated			34	0
40	CASE	8	Anonymized	2021-05-04	Anonymized	Yes	Anonymized	Anonymized	26	1	0	0	0	1	F	90	1.68	90	1.68	31.8878	31.9	0	0	0	1		2020-10-02	1- Cure	No	No	No	No	7	1	1	1	1	0	Yes	Yes	2– More than half of the days	2– More than half of the days	Asymptomatic	7	Sinovac/Instituto Butantã - CoronaVac	2021-01-29	2021-03-04	26	1
41	CASE	9	Anonymized	2021-05-06	Anonymized	Yes	Anonymized	Anonymized	46	0	1	0	0	1	F	69	1.56	69	1.56	28.3531	28.4	0	0	1	0		2020-10-02	1- Cure	No	No	No	No	7	1	1	1	1	0	Yes	Yes	1– Many days	1– Many days	Symptomatic	7	Unvaccinated			45	1
52	CASE	10	Anonymized	2021-05-04	Anonymized	Yes	Anonymized	Anonymized	55	0	0	1	0	1	F	68	1.47	68	1.47	31.4684	31.5	0	0	0	1		2020-10-07	1- Cure	No	No	No	No	7	1	1	1	1	0	No	No	0– None of these days	0– None of these days	Symptomatic	7	Unvaccinated			55	1
53	CASE	11	Anonymized	2021-05-12	Anonymized	Yes	Anonymized	Anonymized	38	0	1	0	0	1	F	83	1.63	83	1.63	31.2394	31.2	0	0	0	1		2020-10-09	1- Cure	No	No	No	No	7	1	1	1	1	0	Yes	Yes	2– More than half of the days	3– Almost all days	Symptomatic	7	Unvaccinated			37	1
57	CASE	12	Anonymized	2021-05-04	Anonymized	Yes	Anonymized	Anonymized	54	0	0	1	0	1	F	60	1.54	60	1.54	25.2994	25.3	0	0	1	0		2020-10-06	1- Cure	No	No	No	No	7	1	1	1	1	0	Yes	Yes	1– Many days	1– Many days	Symptomatic	7	Sinovac/Instituto Butantã - CoronaVac			53	0
66	CASE	13	Anonymized	2021-05-10	Anonymized	Yes	Anonymized	Anonymized	49	0	1	0	0	1	F	64	1.7	64	1.7	22.1453	22.1	0	1	0	0		2020-10-09	1- Cure	No	No	No	No	7	1	1	1	1	0	Yes	No	3– Almost all days	2– More than half of the days	Symptomatic	7	Sinovac/Instituto Butantã - CoronaVac	2021-03-09	2021-04-23	48	1
74	CASE	14	Anonymized	2021-05-21	Anonymized	Yes	Anonymized	Anonymized	61	0	0	1	0	0	M	78	1.7	78	1.7	26.9896	27	0	0	1	0		2020-10-20	1- Cure	No	No	No	No	7	1	1	1	1	0	No	Yes	1– Many days	1– Many days	Symptomatic	7	AstraZeneca/Oxford (Fiocruz) – Covishield	2021-04-23		60	0
75	CASE	15	Anonymized	2021-05-17	Anonymized	Yes	Anonymized	Anonymized	62	0	0	1	0	1	F	65	1.52	65	1.52	28.1337	28.1	0	0	1	0		2020-10-21	1- Cure	No	No	No	No	7	1	1	1	1	0	No	No	1– Many days	1– Many days	Symptomatic	7	Sinovac/Instituto Butantã - CoronaVac			61	1
79	CASE	16	Anonymized	2021-05-17	Anonymized	Yes	Anonymized	Anonymized	26	1	0	0	0	0	M	75	1.84	75	1.84	22.1526	22.2	0	1	0	0		2020-10-20	1- Cure	No	No	No	No	7	1	1	1	1	0	Yes	Yes	3– Almost all days	3– Almost all days		7	Unvaccinated			25	0
81	CASE	17	Anonymized	2021-05-17	Anonymized	Yes	Anonymized	Anonymized	36	0	1	0	0	1	F	87	1.75	87	1.75	28.4082	28.4	0	0	1	0		2020-10-19	1- Cure	Yes	Yes	No	No	7	1	1	1	1	0	Yes	Yes	3– Almost all days	1– Many days	Symptomatic	7	Unvaccinated			36	0
84	CASE	18	Anonymized	2021-05-19	Anonymized	Yes	Anonymized	Anonymized	30	0	1	0	0	1	F	73	1.65	73	1.65	26.8136	26.8	0	0	1	0		2020-10-19	1- Cure	No	No	No	No	7	1	1	1	1	0	Yes	Yes	3– Almost all days	2– More than half of the days	Symptomatic	7	Unvaccinated			29	0
86	CASE	19	Anonymized	2021-05-17	Anonymized	Yes	Anonymized	Anonymized	35	0	1	0	0	1	F	70	1.59	70	1.59	27.6888	27.7	0	0	1	0		2020-10-19	1- Cure	No	No	No	No	7	1	1	1	1	0	Yes	Yes	3– Almost all days	3– Almost all days	Symptomatic	7	Unvaccinated			34	1
93	CASE	20	Anonymized	2021-05-26	Anonymized	Yes	Anonymized	Anonymized	31	0	1	0	0	0	M	88	1.8	88	1.8	27.1605	27.2	0	0	1	0		2020-10-29	1- Cure	No	No	No	No	7	1	1	1	1	0	Yes	Yes	1– Many days	1– Many days	Asymptomatic	7	Unvaccinated			30	1
97	CASE	21	Anonymized	2021-05-26	Anonymized	Yes	Anonymized	Anonymized	49	0	1	0	0	1	F	93	1.6	93	1.6	36.3281	36.3	0	0	0	1		2020-11-26	1- Cure	No	No	No	No	7	1	1	1	1	0	Yes	Yes	1– Many days	1– Many days	Symptomatic	7	Sinovac/Instituto Butantã - CoronaVac	2021-01-16	2021-02-15	48	1
98	CASE	22	Anonymized	2021-05-25	Anonymized	Yes	Anonymized	Anonymized	51	0	0	1	0	1	F	52	1.62	52	1.62	19.8141	19.8	0	1	0	0		2020-10-29	1- Cure	No	No	No	No	7	1	1	1	1	0	Yes	Yes	0– None of these days	0– None of these days	Symptomatic	7	Unvaccinated			50	1
102	CASE	23	Anonymized	2021-05-26	Anonymized	Yes	Anonymized	Anonymized	31	0	1	0	0	0	M	104	1.78	104	1.78	32.8241	32.8	0	0	0	1		2020-10-28	1- Cure	No	No	No	No	7	1	1	1	1	0	Yes	Yes	1– Many days	1– Many days	Symptomatic	7	Unvaccinated			30	1
105	CASE	24	Anonymized	2021-05-24	Anonymized	Yes	Anonymized	Anonymized	58	0	0	1	0	1	F	84	1.6	84	1.6	32.8125	32.8	0	0	0	1		2020-10-28	1- Cure	No	No	No	No	7	1	1	1	1	0	Yes	No	1– Many days	2– More than half of the days	Symptomatic	7	Unvaccinated			57	1
107	CASE	25	Anonymized	2021-05-24	Anonymized	Yes	Anonymized	Anonymized	32	0	1	0	0	1	F	73	1.53	73	1.53	31.1846	31.2	0	0	0	1		2020-10-26	1- Cure	No	No	No	No	7	1	1	1	1	0	Yes	Yes	1– Many days	1– Many days	Symptomatic	7	Unvaccinated			32	1
108	CASE	26	Anonymized	2021-05-28	Anonymized	Yes	Anonymized	Anonymized	56	0	0	1	0	1	F	71	1.6	71	1.6	27.7344	27.7	0	0	1	0		2020-10-26	1- Cure	No	No	No	No	7	1	1	1	1	0	No	No	3– Almost all days	1– Many days	Symptomatic	7	AstraZeneca/Oxford (Fiocruz) – Covishield	2021-05-29		55	0
112	CASE	27	Anonymized	2021-05-25	Anonymized	Yes	Anonymized	Anonymized	29	1	0	0	0	1	F	75	1.64	75	1.64	27.8852	27.9	0	0	1	0		2020-10-26	1- Cure	No	No	No	No	7	1	1	1	1	0	Yes	Yes	3– Almost all days	3– Almost all days		7	Sinovac/Instituto Butantã - CoronaVac	2021-01-28	2021-05-14	29	1
113	CASE	28	Anonymized	2021-05-25	Anonymized	Yes	Anonymized	Anonymized	26	1	0	0	0	1	F	68	1.73	68	1.73	22.7204	22.7	0	1	0	0		2020-11-26	1- Cure	No	No	No	No	7	1	1	1	1	0	No	No	3– Almost all days	2– More than half of the days	Asymptomatic	7	Unvaccinated			25	0
115	CASE	29	Anonymized	2021-05-12	Anonymized	Yes	Anonymized	Anonymized	32	0	1	0	0	1	F	90	1.75	90	1.75	29.3878	29.4	0	0	1	0		2020-11-08	1- Cure	No	No	No	No	6	1	1	1	1	0	No	Yes	3– Almost all days	0– None of these days	Symptomatic	6	Sinovac/Instituto Butantã - CoronaVac	2021-04-09		31	1
116	CASE	30	Anonymized	2021-05-05	Anonymized	Yes	Anonymized	Anonymized	31	0	1	0	0	1	F	67	1.64	67	1.64	24.9108	24.9	0	1	0	0		2020-11-06	1- Cure	No	No	No	No	6	1	1	1	1	0	Yes	Yes	2– More than half of the days	2– More than half of the days	Symptomatic	6	Sinovac/Instituto Butantã - CoronaVac		2021-05-03	31	1
120	CASE	31	Anonymized	2021-05-12	Anonymized	Yes	Anonymized	Anonymized	49	0	1	0	0	1	F	63	1.6	63	1.6	24.6094	24.6	0	1	0	0		2020-11-10	1- Cure	No	No	No	No		1	1	1	1	0	Yes	Yes	2– More than half of the days	2– More than half of the days	Asymptomatic		Sinovac/Instituto Butantã - CoronaVac	2021-01-20	2021-02-10		0
122	CASE	32	Anonymized	2021-05-14	Anonymized	Yes	Anonymized	Anonymized	35	0	1	0	0	1	F	51	1.6	51	1.6	19.9219	19.9	0	1	0	0		2020-11-11	1- Cure	No	No	No	No	6	1	1	1	1	0	Yes	Yes	3– Almost all days	1– Many days	Symptomatic	6	Unvaccinated			35	0
129	CASE	33	Anonymized	2021-05-12	Anonymized	Yes	Anonymized	Anonymized	63	0	0	1	0	0	M	72	1.6	72	1.6	28.125	28.1	0	0	1	0		2020-11-10	1- Cure	No	No	No	No	6	1	1	1	1	0	No	No	1– Many days	0– None of these days	Symptomatic	6	AstraZeneca/Oxford (Fiocruz) – Covishield	2021-04-23		63	1
131	CASE	34	Anonymized	2021-05-11	Anonymized	Yes	Anonymized	Anonymized	47	0	1	0	0	1	F	74	1.73	74	1.73	24.7252	24.7	0	1	0	0		2020-11-09	1- Cure	No	No	No	No	6	1	1	1	1	0	No	Yes	2– More than half of the days	2– More than half of the days	Symptomatic	6	Unvaccinated			46	0
134	CASE	35	Anonymized	2021-05-13	Anonymized	Yes	Anonymized	Anonymized	31	0	1	0	0	1	F	56	1.68	56	1.68	19.8413	19.8	0	1	0	0		2020-11-09	1- Cure	Yes	Yes	No	No	6	1	1	1	1	0	Yes	No	3– Almost all days	3– Almost all days	Symptomatic	6	Unvaccinated			30	0
139	CASE	36	Anonymized	2021-05-11	Anonymized	Yes	Anonymized	Anonymized	39	0	1	0	0	1	F	71	1.67	71	1.67	25.4581	25.5	0	0	1	0		2020-11-09	1- Cure	No	No	No	No	6	1	1	1	1	0	Yes	Yes	3– Almost all days	3– Almost all days	Symptomatic	6	Unvaccinated			39	1
141	CASE	37	Anonymized	2021-05-20	Anonymized	Yes	Anonymized	Anonymized	53	0	0	1	0	1	F	128	1.58	128	1.58	51.2738	51.3	0	0	0	1		2020-11-18	1- Cure	Yes	Yes	No	No	6	1	1	1	1	0	Yes	Yes	3– Almost all days	3– Almost all days	Asymptomatic	6	Unvaccinated			52	1
146	CASE	38	Anonymized	2021-05-27	Anonymized	Yes	Anonymized	Anonymized	26	1	0	0	0	1	F	52	1.61	52	1.61	20.061	20.1	0	1	0	0		2020-11-26	1- Cure	No	No	No	No	6	1	1	1	1	0	No	No	3– Almost all days	2– More than half of the days	Symptomatic	6	Unvaccinated			26	1
155	CASE	39	Anonymized	2021-05-24	Anonymized	Yes	Anonymized	Anonymized	54	0	0	1	0	0	M												2020-11-24	1- Cure	No	No	No	No	6	1	1	1	1	0	Yes	Yes	3– Almost all days	1– Many days	Symptomatic	6	Unvaccinated			54	1
162	CASE	40	Anonymized	2021-05-26	Anonymized	Yes	Anonymized	Anonymized	37	0	1	0	0	1	F	72	1.64	72	1.64	26.7698	26.8	0	0	1	0		2020-11-24	1- Cure	No	No	No	No	6	1	1	1	1	0	Yes	Yes	1– Many days	0– None of these days	Symptomatic	6	Unvaccinated			37	1
169	CASE	41	Anonymized	2021-05-06	Anonymized	Yes	Anonymized	Anonymized	57	0	0	1	0	1	F	53	1.58	53	1.58	21.2306	21.2	0	1	0	0		2020-12-02	3- Data not avaiable		No	No	No	5	1	1	1	1	0	No	No	2– More than half of the days	0– None of these days	Symptomatic	5	Unvaccinated			56	1
170	CASE	42	Anonymized	2021-05-06	Anonymized	Yes	Anonymized	Anonymized	36	0	1	0	0	0	M	85	1.74	85	1.74	28.075	28.1	0	0	1	0		2020-12-02	1- Cure	No	No	No	No	5	1	1	1	1	0	Yes	Yes	2– More than half of the days	1– Many days	Asymptomatic	5	AstraZeneca/Oxford (Fiocruz) – Covishield	2021-04-14		35	0
175	CASE	43	Anonymized	2021-05-31	Anonymized	Yes	Anonymized	Anonymized	29	1	0	0	0	0	M	102	1.93	102	1.93	27.3833	27.4	0	0	1	0		2020-10-02	3- Data not avaiable	No	No	No	No	5	1	1	1	1	0	Yes	Yes	1– Many days	0– None of these days	Asymptomatic	5	Unvaccinated			21	0
186	CASE	44	Anonymized	2021-05-25	Anonymized	Yes	Anonymized	Anonymized	65	0	0	0	1	1	F	40	1.53	40	1.53	17.0874	17.1	1	0	0	0		2020-11-30	1- Cure	Yes	Yes	No	No	6	1	1	1	1	0	Yes	Yes	1– Many days	1– Many days	Symptomatic	6	AstraZeneca/Oxford (Fiocruz) – Covishield	2021-05-17		65	0
190	CASE	45	Anonymized	2021-05-14	Anonymized	Yes	Anonymized	Anonymized	45	0	1	0	0	1	F	58	1.65	58	1.65	21.3039	21.3	0	1	0	0		2020-12-14	3- Data not avaiable	No	No	No	No	5	1	1	1	1	0	Yes	Yes	3– Almost all days	1– Many days	Symptomatic	5	Unvaccinated			45	1
192	CASE	46	Anonymized	2021-05-11	Anonymized	Yes	Anonymized	Anonymized	56	0	0	1	0	0	M	65	1.65	65	1.65	23.8751	23.9	0	1	0	0		2020-12-12	1- Cure	Yes	Yes	Yes	Yes	5	1	1	1	1	0	Yes	Yes	3– Almost all days	3– Almost all days	Symptomatic	5	Unvaccinated			56	0
194	CASE	47	Anonymized	2021-05-14	Anonymized	Yes	Anonymized	Anonymized	39	0	1	0	0	1	F	60	1.55	60	1.55	24.974	25	0	0	1	0		2020-12-10	3- Data not avaiable	No	No	No	No	5	1	1	1	1	0	Yes	Yes	3– Almost all days	3– Almost all days	Symptomatic	5	Sinovac/Instituto Butantã - CoronaVac	2021-01-20	2021-02-12	38	0
195	CASE	48	Anonymized	2021-05-08	Anonymized	Yes	Anonymized	Anonymized	34	0	1	0	0	1	F	71	1.68	71	1.68	25.1559	25.2	0	0	1	0		2020-12-08	1- Cure	No	No	No	No	5	1	1	1	1	0	Yes	Yes	1– Many days	1– Many days	Symptomatic	5	Sinovac/Instituto Butantã - CoronaVac	2021-04-01		33	1
196	CASE	49	Anonymized	2021-05-12	Anonymized	Yes	Anonymized	Anonymized	33	0	1	0	0	0	M	82	1.7	82	1.7	28.3737	28.4	0	0	1	0		2020-12-09	1- Cure	No	No	No	No	5	1	1	1	1	0	Yes	Yes	3– Almost all days	2– More than half of the days	Symptomatic	5	Sinovac/Instituto Butantã - CoronaVac	2021-01-27	2021-02-20	32	1
198	CASE	50	Anonymized	2021-05-14	Anonymized	Yes	Anonymized	Anonymized	42	0	1	0	0	1	F	78	1.59	78	1.59	30.8532	30.9	0	0	0	1		2020-12-14	1- Cure	No	No	No	No	5	1	1	1	1	0	Yes	Yes	2– More than half of the days	2– More than half of the days	Symptomatic	5	Unvaccinated			42	1
199	CASE	51	Anonymized	2021-05-17	Anonymized	Yes	Anonymized	Anonymized	37	0	1	0	0	0	M	93	1.8	93	1.8	28.7037	28.7	0	0	1	0		2020-12-08	1- Cure	No	No	No	No	5	1	1	1	1	0	Yes	Yes	3– Almost all days	1– Many days	Symptomatic	5	Sinovac/Instituto Butantã - CoronaVac	2021-02-01	2021-03-01	37	0
200	CASE	52	Anonymized	2021-05-12	Anonymized	Yes	Anonymized	Anonymized	40	0	1	0	0	1	F	62	1.64	62	1.64	23.0518	23.1	0	1	0	0		2020-12-14	1- Cure	No	No	No	No	5	1	1	1	1	0	No	No	1– Many days	1– Many days	Symptomatic	5	Unvaccinated			40	0
207	CASE	53	Anonymized	2021-05-13	Anonymized	Yes	Anonymized	Anonymized	19	1	0	0	0	0	M	58	1.6	58	1.6	22.6562	22.7	0	1	0	0		2020-12-13	3- Data not avaiable	No	No	No	No	5	1	1	1	1	0	Yes	Yes	3– Almost all days	2– More than half of the days	Symptomatic,Asymptomatic	5	Unvaccinated			19	0
208	CASE	54	Anonymized	2021-05-12	Anonymized	Yes	Anonymized	Anonymized	62	0	0	1	0	1	F	65	1.59	65	1.59	25.711	25.7	0	0	1	0		2020-12-13	1- Cure	No	No	No	No	5	1	1	1	1	0	Yes	Yes	3– Almost all days	3– Almost all days	Symptomatic	5	AstraZeneca/Oxford (Fiocruz) – Covishield	2021-04-30	2021-07-28	61	0
211	CASE	55	Anonymized	2021-05-04	Anonymized	Yes	Anonymized	Anonymized	48	0	1	0	0	1	F	98	1.56	98	1.56	40.2696	40.3	0	0	0	1		2020-12-02	1- Cure	Yes	Yes	No	No	5	1	1	1	1	0	Yes	Yes	3– Almost all days	1– Many days	Symptomatic	5	Unvaccinated			20	1
212	CASE	56	Anonymized	2021-05-05	Anonymized	Yes	Anonymized	Anonymized	52	0	0	1	0	0	M	74	1.55	74	1.55	30.8012	30.8	0	0	0	1		2020-12-01	1- Cure	No	Yes	No	No	5	1	1	1	1	0	Yes	No	3– Almost all days	2– More than half of the days	Symptomatic	5	Unvaccinated			51	0
214	CASE	57	Anonymized	2021-05-13	Anonymized	Yes	Anonymized	Anonymized	42	0	1	0	0	1	F	80	1.58	80	1.58	32.0461	32	0	0	0	1		2020-12-13	1- Cure	No	No	No	No	5	1	1	1	1	0	Yes	Yes	2– More than half of the days	2– More than half of the days	Symptomatic	5	Unvaccinated			41	0
216	CASE	58	Anonymized	2021-05-12	Anonymized	Yes	Anonymized	Anonymized	38	0	1	0	0	1	F	83	1.71	83	1.71	28.3848	28.4	0	0	1	0		2020-12-13	1- Cure	No	No	No	No	5	1	1	1	1	0	Yes	Yes	3– Almost all days	3– Almost all days	Symptomatic	5	Unvaccinated			38	1
224	CASE	59	Anonymized	2021-05-20	Anonymized	Yes	Anonymized	Anonymized	45	0	1	0	0	1	F	102	1.58	102	1.58	40.8588	40.9	0	0	0	1		2020-12-18	1- Cure	No	No	No	No	5	1	1	1	1	0	Yes	Yes	2– More than half of the days	1– Many days	Symptomatic	5	Pfizer/BioNTech - BNT162	2021-05-19		45	0
227	CASE	60	Anonymized	2021-05-21	Anonymized	Yes	Anonymized	Anonymized	26	1	0	0	0	1	F	67	1.55	67	1.55	27.8876	27.9	0	0	1	0		2020-12-17	1- Cure	No	No	No	No	5	1	1	1	1	0	Yes	Yes	3– Almost all days	2– More than half of the days	Symptomatic	5	Unvaccinated			25	0
230	CASE	61	Anonymized	2021-05-25	Anonymized	Yes	Anonymized	Anonymized	38	0	1	0	0	1	F	82	1.53	82	1.53	35.0293	35	0	0	0	1		2020-12-17	1- Cure	No	No	No	No	5	1	1	1	1	0	Yes	Yes	2– More than half of the days	1– Many days	Symptomatic	5	Unvaccinated			38	0
232	CASE	62	Anonymized	2021-05-17	Anonymized	Yes	Anonymized	Anonymized	55	0	0	1	0	1	F	75	1.65	75	1.65	27.5482	27.5	0	0	1	0		2020-12-17	3- Data not avaiable	No	No	No	No	5	1	1	1	1	0	Yes	No	3– Almost all days	3– Almost all days	Asymptomatic	5	Unvaccinated			54	0
3	CONTROL	1	Anonymized	2021-05-06	Anonymized	Yes	Anonymized	Anonymized	35	0	1	0	0	0	M	145	1.85	145	1.85	42.3667	42.4	0	0	0	1		2020-09-07	1- Cure	Yes	Yes	No	No	8	0	0	0	0	1	No	Yes	0– None of these days	0– None of these days	Symptomatic	8	Unvaccinated			34	1
8	CONTROL	2	Anonymized	2021-05-20	Anonymized	Yes	Anonymized	Anonymized	27	1	0	0	0	1	F	55	1.58	55	1.58	22.0317	22	0	1	0	0		2020-09-18	1- Cure	No	No	No	No	8	0	0	0	0	1	Yes	No	0– None of these days	0– None of these days	Asymptomatic	8	Sinovac/Instituto Butantã - CoronaVac			26	1
12	CONTROL	3	Anonymized	2021-05-18	Anonymized	Yes	Anonymized	Anonymized	27	1	0	0	0	1	F	56	1.61	56	1.61	21.6041	21.6	0	1	0	0		2020-09-21	1- Cure	No	No	No	No	8	0	0	0	0	1	No	No	2– More than half of the days	2– More than half of the days	Symptomatic	8	AstraZeneca/Oxford (Fiocruz) – Covishield	2021-05-07		27	1
15	CONTROL	4	Anonymized	2021-05-21	Anonymized	Yes	Anonymized	Anonymized	31	0	1	0	0	0	M	79	1.7	79	1.7	27.3356	27.3	0	0	1	0		2020-09-18	1- Cure	No	No	No	No	8	0	0	0	0	1	No	No	2– More than half of the days	1– Many days	Symptomatic	8	Sinovac/Instituto Butantã - CoronaVac	2021-01-26	2021-02-21	30	1
20	CONTROL	5	Anonymized	2021-05-26	Anonymized	Yes	Anonymized	Anonymized	21	1	0	0	0	1	F	68	1.69	68	1.69	23.8087	23.8	0	1	0	0		2020-09-23		No	No	No	No	-4	0	0	0	0	1	Yes	Yes	1– Many days	0– None of these days	Symptomatic	-4	Unvaccinated			20	1
26	CONTROL	6	Anonymized	2021-05-26	Anonymized	Yes	Anonymized	Anonymized	25	1	0	0	0	1	F	53	1.58	53	1.58	21.2306	21.2	0	1	0	0		2020-09-23	1- Cure	No	No	No	No	8	0	0	0	0	1	Yes	Yes			Symptomatic	8	Sinovac/Instituto Butantã - CoronaVac			24	1
31	CONTROL	7	Anonymized	2021-05-05	Anonymized	Yes	Anonymized	Anonymized	31	0	1	0	0	1	F	100	1.66	100	1.66	36.2897	36.3	0	0	0	1		2020-10-04	1- Cure	No	No	No	No	7	0	0	0	0	1	No	No	0– None of these days	0– None of these days	Symptomatic	7	Unvaccinated			31	0
37	CONTROL	8	Anonymized	2021-05-06	Anonymized	Yes	Anonymized	Anonymized	63	0	0	1	0	1	F												2020-10-03	1- Cure	No	No	No	No	7	0	0	0	0	1	No	No	0– None of these days	0– None of these days	Symptomatic	7	AstraZeneca/Oxford (Fiocruz) – Covishield	2021-04-15		63	1
39	CONTROL	9	Anonymized	2021-05-02	Anonymized	Yes	Anonymized	Anonymized	28	1	0	0	0	1	F	58	1.58	58	1.58	23.2335	23.2	0	1	0	0		2020-10-03	1- Cure	No	No	No	No	7	0	0	0	0	1	Yes	Yes	3– Almost all days	1– Many days	Symptomatic	7	Sinovac/Instituto Butantã - CoronaVac	2021-01-28	2021-02-23	27	1
42	CONTROL	10	Anonymized	2021-05-04	Anonymized	Yes	Anonymized	Anonymized	67	0	0	0	1	1	F												2020-10-02	1- Cure	Yes	Yes	No	No	8	0	0	0	0	1	Yes	Yes	1– Many days	1– Many days	Asymptomatic	8	Sinovac/Instituto Butantã - CoronaVac	2021-04-04	2021-05-04	67	0
45	CONTROL	11	Anonymized	2021-05-04	Anonymized	Yes	Anonymized	Anonymized	71	0	0	0	1	1	F	77	1.53	77	1.53	32.8933	32.9	0	0	0	1		2020-10-02	1- Cure	No	No	No	No	8	0	0	0	0	1	No	No	0– None of these days	0– None of these days	Symptomatic	8	Sinovac/Instituto Butantã - CoronaVac	2021-01-19	2021-04-30	30	0
55	CONTROL	12	Anonymized	2021-05-03	Anonymized	Yes	Anonymized	Anonymized	40	0	1	0	0	0	M	86	1.73	86	1.73	28.7347	28.7	0	0	1	0		2020-10-06	1- Cure	No	No	No	No	7	0	0	0	0	1	No	No	2– More than half of the days	2– More than half of the days	Asymptomatic	7	Unvaccinated			41	1
56	CONTROL	13	Anonymized	2021-05-05	Anonymized	Yes	Anonymized	Anonymized	33	0	1	0	0	0	M	88	1.83	88	1.83	26.2773	26.3	0	0	1	0		2020-10-05	1- Cure	No	No	No	No	7	0	0	0	0	1	Yes	Yes	3– Almost all days	1– Many days	Asymptomatic	7	Unvaccinated			32	1
58	CONTROL	14	Anonymized	2021-05-17	Anonymized	Yes	Anonymized	Anonymized	25	1	0	0	0	0	M	83	1.83	83	1.83	24.7843	24.8	0	1	0	0		2020-10-15	1- Cure	No	No	No	No	8	0	0	0	0	1	No	No	0– None of these days	3– Almost all days	Asymptomatic	8	Não sabe informar			24	0
59	CONTROL	15	Anonymized	2021-05-20	Anonymized	Yes	Anonymized	Anonymized	31	0	1	0	0	1	F	55	1.55	55	1.55	22.8928	22.9	0	1	0	0		2020-10-15	1- Cure	No	No	No	No	7	0	0	0	0	1	No	No	0– None of these days	0– None of these days	Symptomatic	7	Sinovac/Instituto Butantã - CoronaVac	2021-01-25	2021-02-12	30	1
62	CONTROL	16	Anonymized	2021-05-13	Anonymized	Yes	Anonymized	Anonymized	32	0	1	0	0	0	M	86	1.83	86	1.83	25.6801	25.7	0	0	1	0		2020-10-12	1- Cure	No	No	No	No	7	0	0	0	0	1	No	No	1– Many days	1– Many days	Asymptomatic	7	Sinovac/Instituto Butantã - CoronaVac	2021-02-11	2021-02-25	32	0
72	CONTROL	17	Anonymized	2021-05-31	Anonymized	Yes	Anonymized	Anonymized	22	1	0	0	0	0	M												2020-10-20	1- Cure	No	No	No	No	7	0	0	0	0	1	No	No	0– None of these days	0– None of these days	Symptomatic	7	Unvaccinated			21	0
76	CONTROL	18	Anonymized	2021-05-20	Anonymized	Yes	Anonymized	Anonymized	26	1	0	0	0	1	F	75	1.66	75	1.66	27.2173	27.2	0	0	1	0		2020-10-21	1- Cure	No	No	No	No	7	0	0	0	0	1	Yes	No	0– None of these days	0– None of these days	Asymptomatic	7	Sinovac/Instituto Butantã - CoronaVac	2021-01-20	2021-02-11	26	0
77	CONTROL	19	Anonymized	2021-05-19	Anonymized	Yes	Anonymized	Anonymized	38	0	1	0	0	1	F	100	1.72	100	1.72	33.8021	33.8	0	0	0	1		2020-10-20	1- Cure	No	No	No	No	7	0	0	0	0	1	Yes	Yes	3– Almost all days	3– Almost all days	Symptomatic	7	Unvaccinated			37	1
80	CONTROL	20	Anonymized	2021-05-17	Anonymized	Yes	Anonymized	Anonymized	50	0	0	1	0	1	F	82	1.66	82	1.66	29.7576	29.8	0	0	1	0		2020-10-15	1- Cure	No	No	No	No	7	0	0	0	0	1	No	No	0– None of these days	0– None of these days	Symptomatic	7	Sinovac/Instituto Butantã - CoronaVac	2021-02-03	2021-03-01	49	0
82	CONTROL	21	Anonymized	2021-05-20	Anonymized	Yes	Anonymized	Anonymized	35	0	1	0	0	1	F	51	1.62	51	1.62	19.433	19.4	0	1	0	0		2020-10-19	1- Cure	No	No	No	No	7	0	0	0	0	1	No	No	3– Almost all days	2– More than half of the days	Asymptomatic	7	Unvaccinated			35	1
89	CONTROL	22	Anonymized	2021-05-19	Anonymized	Yes	Anonymized	Anonymized	74	0	0	0	1	0	M	70	1.5	70	1.5	31.1111	31.1	0	0	0	1		2020-10-19	1- Cure	Yes	Yes	No	No	7	0	0	0	0	1	Yes	Yes	1– Many days	1– Many days	Asymptomatic	7	Sinovac/Instituto Butantã - CoronaVac	2021-04-08	2021-05-01	74	0
94	CONTROL	23	Anonymized	2021-05-26	Anonymized	Yes	Anonymized	Anonymized	25	1	0	0	0	0	M												2020-10-29	1- Cure	No	No	No	No	7	0	0	0	0	1	No	No	1– Many days	1– Many days	Symptomatic	7	Unvaccinated			25	1
95	CONTROL	24	Anonymized	2021-05-27	Anonymized	Yes	Anonymized	Anonymized	47	0	1	0	0	1	F	99	1.73	99	1.73	33.0783	33.1	0	0	0	1		2020-10-26	1- Cure	No	No	No	No	7	0	0	0	0	1	Yes	Yes	1– Many days	1– Many days	Symptomatic	7	Sinovac/Instituto Butantã - CoronaVac	2021-02-25	2021-03-15	44	1
96	CONTROL	25	Anonymized	2021-05-25	Anonymized	Yes	Anonymized	Anonymized	21	1	0	0	0	1	F												2020-10-29	1- Cure	No	No	No	No	7	0	0	0	0	1	No	No	1– Many days	0– None of these days	Symptomatic	7	Unvaccinated			20	1
101	CONTROL	26	Anonymized	2021-05-27	Anonymized	Yes	Anonymized	Anonymized	37	0	1	0	0	1	F	63	1.65	63	1.65	23.1405	23.1	0	1	0	0		2020-10-24	1- Cure	No	No	No	No	7	0	0	0	0	1	No	No	1– Many days	1– Many days	Symptomatic	7	Sinovac/Instituto Butantã - CoronaVac	2021-01-28	2021-02-25	37	0
106	CONTROL	27	Anonymized	2021-05-27	Anonymized	Yes	Anonymized	Anonymized	32	0	1	0	0	1	F	80	1.67	80	1.67	28.6851	28.7	0	0	1	0		2020-10-26	1- Cure	No	No	No	No	7	0	0	0	0	1	No	No	3– Almost all days	0– None of these days	Asymptomatic	7	Sinovac/Instituto Butantã - CoronaVac	2021-02-02	2021-02-17	31	0
117	CONTROL	28	Anonymized	2021-05-02	Anonymized	Yes	Anonymized	Anonymized	40	0	1	0	0	1	F	85	1.68	85	1.68	30.1162	30.1	0	0	0	1		2020-11-03	1- Cure	No	No	No	No	6	0	0	0	0	1	Yes	Yes	3– Almost all days	3– Almost all days	Symptomatic	6	Unvaccinated			39	0
119	CONTROL	29	Anonymized	2021-05-06	Anonymized	Yes	Anonymized	Anonymized	37	0	1	0	0	1	F	75	1.59	75	1.59	29.6665	29.7	0	0	1	0		2020-11-03	1- Cure	No	No	No	No	6	0	0	0	0	1	No	No	1– Many days	2– More than half of the days	Asymptomatic	6	Unvaccinated			36	1
128	CONTROL	30	Anonymized	2021-05-11	Anonymized	Yes	Anonymized	Anonymized	29	1	0	0	0	0	M	70	1.8	70	1.8	21.6049	21.6	0	1	0	0		2020-11-11	1- Cure	No	No	No	No	6	0	0	0	0	1	No	No	0– None of these days	0– None of these days	Symptomatic	6	Sinovac/Instituto Butantã - CoronaVac			28	0
133	CONTROL	31	Anonymized	2021-05-14	Anonymized	Yes	Anonymized	Anonymized	68	0	0	0	1	0	M	70	1.7	70	1.7	24.2215	24.2	0	1	0	0		2020-11-11	3- Data not avaiable	Yes	Yes	No	Yes		0	0	0	0	1	No	No	0– None of these days	0– None of these days			Sinovac/Instituto Butantã - CoronaVac		2021-04-22	67	0
140	CONTROL	32	Anonymized	2021-05-11	Anonymized	Yes	Anonymized	Anonymized	58	0	0	1	0	0	M	75	1.68	75	1.68	26.5731	26.6	0	0	1	0		2020-11-09	1- Cure	Yes	Yes	No	No	6	0	0	0	0	1	Yes	Yes	1– Many days	0– None of these days	Symptomatic	6	AstraZeneca/Oxford (Fiocruz) – Covishield	2021-05-26		58	1
144	CONTROL	33	Anonymized	2021-05-27	Anonymized	Yes	Anonymized	Anonymized	34	0	1	0	0	1	F	67	1.56	67	1.56	27.5312	27.5	0	0	1	0		2020-11-25	1- Cure	No	No	No	No	6	0	0	0	0	1	No	No	1– Many days	0– None of these days	Symptomatic	6	Sinovac/Instituto Butantã - CoronaVac			34	1
145	CONTROL	34	Anonymized	2021-05-25	Anonymized	Yes	Anonymized	Anonymized	25	1	0	0	0	1	F	70	1.65	70	1.65	25.7117	25.7	0	0	1	0		2020-11-26	1- Cure	No	No	No	No	6	0	0	0	0	1	Yes	Yes	3– Almost all days	2– More than half of the days	Symptomatic	6	Unvaccinated			24	0
151	CONTROL	35	Anonymized	2021-05-24	Anonymized	Yes	Anonymized	Anonymized	39	0	1	0	0	1	F	75	1.59	75	1.59	29.6665	29.7	0	0	1	0		2020-11-24	1- Cure	No	No	No	No	6	0	0	0	0	1	Yes	Yes	3– Almost all days	3– Almost all days		6	Unvaccinated			38	1
152	CONTROL	36	Anonymized	2021-05-27	Anonymized	Yes	Anonymized	Anonymized	27	1	0	0	0	1	F	60	1.61	60	1.61	23.1473	23.1	0	1	0	0		2020-11-26	1- Cure	No	Yes		No	6	0	0	0	0	1	Yes	Yes	3– Almost all days	3– Almost all days	Symptomatic	6	Sinovac/Instituto Butantã - CoronaVac	2021-01-03	2021-02-11	27	1
153	CONTROL	37	Anonymized	2021-05-11	Anonymized	Yes	Anonymized	Anonymized	50	0	0	1	0	1	F	54	1.52	54	1.52	23.3726	23.4	0	1	0	0		2020-11-09	3- Data not avaiable	No	No	No	No	6	0	0	0	0	1	Yes	Yes	1– Many days	0– None of these days	Symptomatic	6	Unvaccinated	2021-05-15		50	0
157	CONTROL	38	Anonymized	2021-05-24	Anonymized	Yes	Anonymized	Anonymized	49	0	1	0	0	1	F	94	1.57	94	1.57	38.1354	38.1	0	0	0	1		2020-11-23	1- Cure	No	No	No	No	6	0	0	0	0	1	Yes	Yes	0– None of these days	1– Many days	Asymptomatic	6	Unvaccinated			48	0
158	CONTROL	39	Anonymized	2021-05-26	Anonymized	Yes	Anonymized	Anonymized	52	0	0	1	0	0	M	89	1.8	89	1.8	27.4691	27.5	0	0	1	0		2020-11-23	1- Cure	No	No	No	No	6	0	0	0	0	1	No	No	1– Many days	1– Many days	Symptomatic	6	Unvaccinated			51	0
164	CONTROL	40	Anonymized	2021-05-25	Anonymized	Yes	Anonymized	Anonymized	40	0	1	0	0	0	M	92	1.8	92	1.8	28.3951	28.4	0	0	1	0		2020-11-26	1- Cure	No	No	No	No	6	0	0	0	0	1	No	No	0– None of these days	0– None of these days	Asymptomatic	6	AstraZeneca/Oxford (Fiocruz) – Covishield	2021-05-14	2021-08-14	40	0
167	CONTROL	41	Anonymized	2021-05-03	Anonymized	Yes	Anonymized	Anonymized	62	0	0	1	0	1	F												2020-12-02	1- Cure	No	No	No	No	5	0	0	0	0	1	No	No	0– None of these days	0– None of these days	Symptomatic	5	Unvaccinated			61	1
174	CONTROL	42	Anonymized	2021-05-07	Anonymized	Yes	Anonymized	Anonymized	22	1	0	0	0	1	F	61	1.68	61	1.68	21.6128	21.6	0	1	0	0		2020-10-02	3- Data not avaiable	No	No	No	No	5	0	0	0	0	1	Yes	No	2– More than half of the days	1– Many days	Symptomatic	5	Unvaccinated			21	0
179	CONTROL	43	Anonymized	2021-05-07	Anonymized	Yes	Anonymized	Anonymized	36	0	1	0	0	1	F	75	1.74	75	1.74	24.7721	24.8	0	1	0	0		2020-12-01	1- Cure	No	No	No	No	5	0	0	0	0	1	No	No	0– None of these days	0– None of these days	Symptomatic	5	Sinovac/Instituto Butantã - CoronaVac	2021-01-21	2021-02-18	35	1
181	CONTROL	44	Anonymized	2021-05-26	Anonymized	Yes	Anonymized	Anonymized	71	0	0	0	1	1	F	70	1.53	70	1.53	29.903	29.9	0	0	1	0		2020-11-30	1- Cure	No	No	No	No	6	0	0	0	0	1	No	No	3– Almost all days	3– Almost all days	Asymptomatic	6	Sinovac/Instituto Butantã - CoronaVac			70	0
191	CONTROL	45	Anonymized	2021-05-25	Anonymized	Yes	Anonymized	Anonymized	54	0	0	1	0	1	F	100	1.7	100	1.7	34.6021	34.6	0	0	0	1		2020-12-13	1- Cure	No	No	No	No	5	0	0	0	0	1	No	No	0– None of these days	0– None of these days	Symptomatic	5	Sinovac/Instituto Butantã - CoronaVac	2021-01-27	2021-02-22		1
219	CONTROL	46	Anonymized	2021-05-14	Anonymized	Yes	Anonymized	Anonymized	32	0	1	0	0	1	F	82	1.74	82	1.74	27.0842	27.1	0	0	1	0		2020-12-11	1- Cure	No	No	No	No	5	0	0	0	0	1	Yes	Yes	3– Almost all days	3– Almost all days	Symptomatic	5	Unvaccinated			32	0
221	CONTROL	47	Anonymized	2021-05-21	Anonymized	Yes	Anonymized	Anonymized	29	1	0	0	0	0	M	87	1.74	87	1.74	28.7356	28.7	0	0	1	0		2020-12-18	1- Cure	Yes	Yes	No	Yes	5	0	0	0	0	1	No	No	1– Many days	1– Many days	Symptomatic	5	Unvaccinated			28	0
223	CONTROL	48	Anonymized	2021-05-12	Anonymized	Yes	Anonymized	Anonymized	20	1	0	0	0	0	M	57	1.8	57	1.8	17.5926	17.6	1	0	0	0		2020-12-11	1- Cure	No	No	No	No	5	0	0	0	0	1	No	No	0– None of these days	0– None of these days	Symptomatic	5	Unvaccinated			19	0
225	CONTROL	49	Anonymized	2021-05-19	Anonymized	Yes	Anonymized	Anonymized	40	0	1	0	0	1	F	61	1.68	61	1.68	21.6128	21.6	0	1	0	0		2020-12-18	1- Cure	No	No	No	No	5	0	0	0	0	1	Yes	Yes	3– Almost all days	3– Almost all days	Symptomatic	5	Sinovac/Instituto Butantã - CoronaVac	2021-03-15	2021-06-04	39	1
231	CONTROL	50	Anonymized	2021-05-19	Anonymized	Yes	Anonymized	Anonymized	50	0	0	1	0	0	M	110	1.8	110	1.8	33.9506	34	0	0	0	1		2020-12-17	1- Cure	No	No	No	No	5	0	0	0	0	1	No	No	0– None of these days	0– None of these days	Asymptomatic	5	Unvaccinated			50	1
233	CONTROL	51	Anonymized	2021-05-19	Anonymized	Yes	Anonymized	Anonymized	42	0	1	0	0	0	M	96	1.8	96	1.8	29.6296	29.6	0	0	1	0		2020-12-17	1- Cure	No	No	No	No	5	0	0	0	0	1	No	No	0– None of these days	0– None of these days	Symptomatic	5	AstraZeneca/Oxford (Fiocruz) – Covishield	2021-04-01		42	1
236	CONTROL	52	Anonymized	2021-05-19	Anonymized	Yes	Anonymized	Anonymized	22	1	0	0	0	1	F	65	1.63	65	1.63	24.4646	24.5	0	1	0	0		2020-12-17	1- Cure	No	No	No	No	5	0	0	0	0	1	No	No	0– None of these days	2– More than half of the days	Asymptomatic	5	Sinovac/Instituto Butantã - CoronaVac	2021-03-11	2021-03-25	21	1
[truncated: 82 more columns]
